1  
2  
3  
4  
5  
6  
7  
8  
9  
10  
11  
12  
13  
14  
15  
16  
17  
18  
19  
20  
21  
22  
23  
24  
25  
26  
27  
28  
29  
30  
31  
32  
33  
34  
35  
36  
37  
38  
39  
40

## Phylogenomics and species delimitation of mobulid rays reveals cryptic diversity and a new species of manta ray

Jane Hosegood<sup>1,2,11</sup> \*, Emily Humble<sup>2,3</sup>, Rob Ogden<sup>3,4</sup>, Mark de Bruyn<sup>1,5</sup>, Si Creer<sup>1</sup>, Guy Stevens<sup>2</sup>, Mohammed Abudaya<sup>6</sup>, Kim Bassos-Hull<sup>7</sup>, Ramon Bonfil<sup>8</sup>, Daniel Fernando<sup>2,9,10</sup>, Andrew D. Foote<sup>1</sup>, Helen Hipperson<sup>11</sup>, Rima W. Jabado<sup>12</sup>, Jennifer Kaden<sup>13</sup>, Muhammad Moazzam<sup>14</sup>, Lauren Peel<sup>2,15,16,17</sup>, Stephen Pollett<sup>2</sup>, Alessandro Ponzio<sup>18</sup>, Marloes Poortvliet<sup>19</sup>, Jihad Salah<sup>20</sup>, Helen Senn<sup>13</sup>, Joshua Stewart<sup>2,21</sup>, Sabine Wintner<sup>22,23</sup> and Gary Carvalho<sup>1</sup>

<sup>1</sup> Molecular Ecology and Fisheries Genetics Laboratory, Bangor University, Bangor, LL57 2UW, UK

<sup>2</sup> The Manta Trust, Catemwood House, Norwood Lane, Dorset, DT2 0NT, UK

<sup>3</sup> Royal (Dick) School of Veterinary Studies and the Roslin Institute, University of Edinburgh, Easter Bush Campus, EH25 9RG, UK

<sup>4</sup> TRACE Wildlife Forensics Network, Edinburgh, EH12 6LE, UK

<sup>5</sup> The University of Sydney, School of Life and Environmental Sciences, Sydney 2006, NSW, Australia

<sup>6</sup> National Research Center, Gaza City-Palestine

<sup>7</sup> The Center for Shark Research, Mote Marine Laboratory, 1600 Ken Thompson Parkway, Sarasota, FL 34236, USA

<sup>8</sup> Océanos Vivientes A. C. Cerrada Monserrat 9, Col. La Candelaria. CDMX 04380 Mexico.

<sup>9</sup> Department of Biology and Environmental Science, Linnaeus University, SE 39182 Kalmar, Sweden

<sup>10</sup> Blue Resources Trust, Colombo, Sri Lanka

<sup>11</sup> NERC Biomolecular Analysis Facility, Department of Animal and Plant Sciences, University of Sheffield, Western Bank, Sheffield, S10 2TN, UK

<sup>12</sup> Gulf Elasmobranch Project, P.O. Box 29588, Dubai, UAE

<sup>13</sup> RZSS WildGenes Lab, Royal Zoological Society of Scotland, Edinburgh EH12 6TS, UK

<sup>14</sup> WWF-Pakistan, 46-K, PECHS, Block 6, Karachi 75400, Pakistan

<sup>15</sup> School of Biological Sciences, University of Western Australia, Crawley, WA 6009, Australia

<sup>16</sup> The Australian Institute of Marine Science, Crawley, WA 6009, Australia

<sup>17</sup> Save Our Seas Foundation – D’Arros Research Centre, CH-1201, Geneva, Switzerland

<sup>18</sup> Large Marine Vertebrates Research Institute Philippines, Cagulada compound, Jagna, Bohol, Philippines

<sup>19</sup> Tolheksbos 57, 2134 GH Hoofddorp, the Netherlands

<sup>20</sup> Ministry of Agriculture Directorate General of Fisheries, Palestine

<sup>21</sup> Scripps Institution of Oceanography, La Jolla, CA, United States

<sup>22</sup> KwaZulu-Natal Sharks Board, Private Bag 2, Umhlanga Rocks 4320, South Africa

<sup>23</sup> School of Life Sciences, University of KwaZulu-Natal, Durban 4000, South Africa

\*Corresponding author: [bsp420@bangor.ac.uk](mailto:bsp420@bangor.ac.uk) or [jane@mantatrust.org](mailto:jane@mantatrust.org)

## 41 Abstract

42 Practical biodiversity conservation relies on delineation of meaningful units, particularly with  
43 respect to global conventions and regulatory frameworks. Species delimitation methods have been  
44 revolutionised with the advent of next-generation sequencing approaches, allowing diversity within  
45 species radiations to be assessed with genome-wide data. Manta and devil rays (*Mobula* spp.) are  
46 threatened globally primarily from targeted and bycatch fishing pressure, resulting in recent  
47 protective measures under several global conventions and frameworks. However, a collective lack  
48 of representative global samples, ongoing taxonomic ambiguity, and ineffectual traceability  
49 measures combine to constrain the development and implementation of a coherent and  
50 enforceable conservation strategy for these species. Here we generate genome-wide Single  
51 Nucleotide Polymorphism (SNP) data from a globally and taxonomically comprehensive set of  
52 mobulid tissue samples, producing the most extensive phylogeny for the Mobulidae to date. We  
53 assess patterns of monophyly and combine this with species delimitation based on the multispecies  
54 coalescent. We find robust evidence for an undescribed species of manta ray in the Gulf of Mexico,  
55 and for the resurrection of a recently synonymised species, *Mobula eregoodootenkee*. Further  
56 resolution is achieved at the population level, where geographic population structure is identified  
57 in *Mobula* species. In addition, we estimate the optimal species tree for the group and identify  
58 substantial incomplete lineage sorting, where standing variation in extinct ancestral populations is  
59 hypothesised to drive taxonomic uncertainty. Our results provide genome-wide data to support a  
60 taxonomic review of the Mobulidae, and generate a robust taxonomic framework to support  
61 effective management, conservation and law enforcement strategies.

62

## 63 Introduction

64 The Anthropocene has been characterised by unprecedented human exploitation of natural  
65 resources, resulting in global threats to biodiversity and extinction events within many taxa (Dirzo *et*  
66 *al.*, 2014; McGill *et al.*, 2015). Effective measures for the conservation of biodiversity require an  
67 understanding and characterisation of diversity within and among species. The field of conservation  
68 genetics provides opportunities for quantifying diversity across space and time (Allendorf *et al.*, 2010)  
69 and such approaches are increasingly powerful with the growing incorporation of genome-wide data.  
70 Species delimitation, the process by which populations of individuals are grouped into reproductively  
71 isolated and separately evolving units, is a fundamental application of genomic data to biodiversity  
72 conservation.

73 Accordingly, species delimitation has received increasing attention recently, with numerous methods  
74 now available (Carstens *et al.*, 2013; Zhang *et al.*, 2013; Grummer *et al.*, 2014; Leache *et al.*, 2014;  
75 Rannala 2015; Yang 2015). Traditional approaches typically relied upon morphological observation,  
76 often resulting in artificially broad delineations arising from difficulties in detecting and identifying  
77 cryptic species (Frankham *et al.*, 2012). More recently, DNA sequencing has allowed genetic data to  
78 be utilised for species delimitation, although early approaches were limited to information from only  
79 a few genes or markers. These early approaches therefore left interpretation challenging, particularly  
80 in recently diverged groups with substantial incomplete lineage sorting (Maddison 1997; Maddison  
81 and Knowles, 2006). Genome-wide multi-locus approaches have increased the resolution of species  
82 delimitation studies and have been used to clarify contentious relationships and phylogenies (eg.  
83 Leache *et al.*, 2014; Herrera and Shank, 2016), and disclose previously unknown diversity (eg. Pante  
84 *et al.* 2014). Species delimitation remains constrained by the lack of a single universal species concept  
85 (De Queiroz, 2007; Frankham *et al.*, 2012). The delineation of monophyletic assemblages underpins  
86 the phylogenetic species concept, and the biological species concept where species occur in sympatry  
87 (Frankham *et al.*, 2012). This has application in characterisation of both Conservation Units and  
88 Evolutionary Significant Units for the purposes of effective conservation (Funk *et al.*, 2012).

89 Globally, biodiversity conservation is enacted through conventions and regulatory frameworks,  
90 including the Convention on the International Trade in Endangered Species of Wild Fauna and Flora  
91 (CITES), and the Convention on the Conservation of Migratory Species of Wild Animals (CMS). These  
92 conventions are implemented through national legislation acting at the species level (Vincent *et al.*,  
93 2014), and effective wildlife protection, management and law enforcement therefore depends on  
94 unambiguous species classification. Recent examples of proposed taxonomic revisions having far-  
95 reaching consequences for biodiversity conservation include giraffe (Fennessey *et al.*, 2016; Bercovitch  
96 *et al.*, 2017; Fennessey *et al.*, 2017) and African elephant (Roca *et al.*, 2001). In these cases, genetic  
97 research has led to possible reclassification and consequent changes to the legal status of these  
98 threatened megafauna.

99 In the marine realm, manta and devil rays (*Mobula* spp.), are circumglobally distributed megafauna of  
100 high conservation priority (Lawson *et al.*, 2017) that also carry substantial economic value for tourism  
101 (O'Malley *et al.*, 2013). Despite the economic benefits provided through the non-consumptive use of  
102 these species (family Mobulidae; collectively, mobulids), this vulnerable group is threatened primarily  
103 by intense targeted and bycatch fishing pressure, in part driven by demand for their gill plates, which  
104 are utilised in Asian medicines (Couturier *et al.*, 2012; Croll *et al.*, 2016; Lawson *et al.*, 2017; O'Malley  
105 *et al.*, 2017). Exploitation of mobulid rays for human consumption is considered unsustainable due to  
106 their life history traits; late maturation, low reproductive rates and long generation times, hindering

107 their ability to recover from fishing impacts (Dulvy *et al.*, 2014). To alleviate these threats, all species  
108 of mobulid ray have recently been listed on the CITES Appendix II to regulate international trade and  
109 to the CMS Appendices I and II for governments to coordinate efforts to protect and conserve these  
110 species. Additionally, several species are regulated under national jurisdictions, with varying levels of  
111 protection and enforcement. Unfortunately, a collective lack of representative global samples,  
112 ongoing taxonomic ambiguity, and ineffectual traceability measures has constrained the development  
113 and implementation of a coherent and enforceable conservation strategy (Stewart, 2018a).

114 Recently, White *et al.* (2017) conducted an evaluation of genetic and morphological datasets for 11  
115 previously recognised species of mobulid ray across two genera. Eight species were recognised, and  
116 the authors called for the genus *Manta* (consisting of two species; *Manta alfredi* and *Manta birostris*)  
117 to be subsumed into *Mobula* (devil rays); a recommendation that is yet to be reviewed by the  
118 International Commission on Zoological Nomenclature (ICZN) at the time of writing. For the purposes  
119 of this study, we use the common name ‘manta ray’ to refer to individuals of the species *M. alfredi*  
120 and *M. birostris* or species identified therein. Although multi-locus genetic datasets were used in the  
121 study by White *et al.* (2017), only a single sample was included per putative species, thereby  
122 preventing delineation of monophyletic species groups. Furthermore, the conclusion that *M.*  
123 *rochebrunei* is a junior synonym of *M. hypostoma* was based entirely on mitogenome data (White *et*  
124 *al.*, 2017), which is considered unsuitable for species delimitation or phylogenetics when used in  
125 isolation (Petit and Excoffier, 2009; Herrera and Shank, 2016). Prior to this study, the most recent  
126 major taxonomic change for the Mobulidae came with the resurrection of species status for *Manta*  
127 *alfredi*, resulting in recognition of two species of manta ray (Marshall *et al.*, 2009). Whilst the validity  
128 of this split has been confirmed with genetic data (Kashiwagi *et al.*, 2012), there remains evidence of  
129 both historic (Kashiwagi *et al.*, 2012) and modern (Walter *et al.*, 2014) hybridisation between the two  
130 species. In addition, a third putative species of manta ray is hypothesised to occur in the Caribbean  
131 (Marshall *et al.*, 2009; Hinojosa-Alvarez *et al.*, 2016).

132 The Mobulidae is a group characterised by recent divergence times, estimated to have diverged from  
133 Rhinoptera only 30 million years ago (MYA), and having undergone relatively short bursts of speciation  
134 associated with periods of decreased ocean productivity (Poortvliet *et al.*, 2015), of which the most  
135 recent known is only 0.5MYA (Kashiwagi *et al.*, 2012). The age of these divergences implies that  
136 secondary contact and introgression between separately evolving species is likely to be widespread  
137 within the group, further encumbering efforts to define species boundaries.

138 Such ongoing uncertainties within the Mobulidae demonstrate a requirement for genomic approaches  
139 to enable robust species delimitation. Here, we generate double-digest Restriction-site Associated

140 DNA sequence (ddRAD) data (Peterson *et al.*, 2012) from the largest and most comprehensive  
141 geographic sampling of mobulid species (Figure 1), inclusive of taxon replicates within sampling sites  
142 to: (1) delimit mobulid species, resulting in identification of cryptic diversity and an undescribed  
143 species of manta ray, (2) estimate the optimal species tree for the group, and (3) identify the extent  
144 of incomplete lineage sorting.

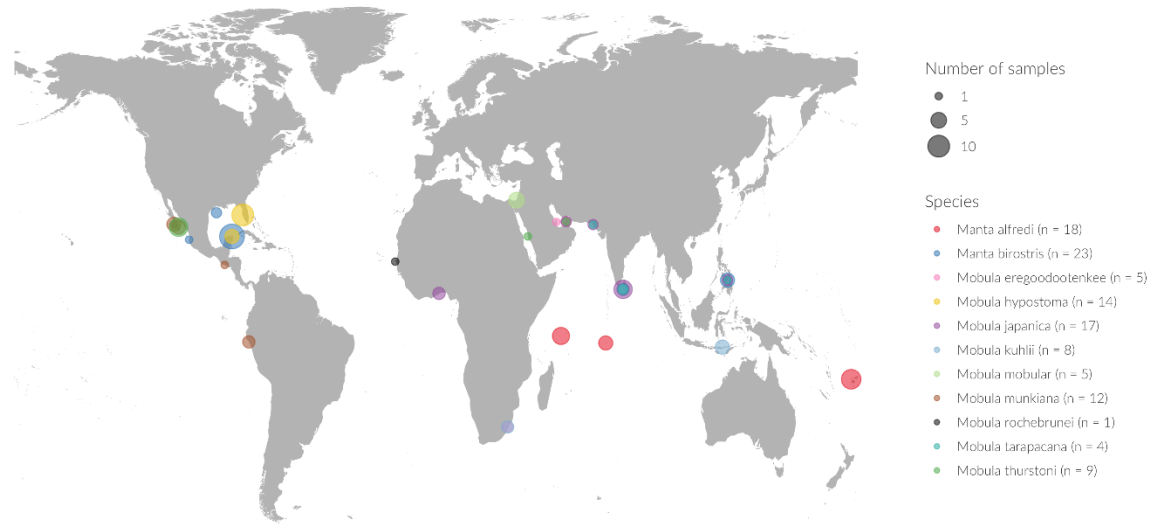

145  
146 Figure 1: Map of mobulid sampling locations. Species are denoted by different colour points, scaled  
147 for sample size. Total numbers of samples for each species are given in the legend. See Supplementary  
148 Table 1 for further details. Note that we use species names that were assigned to samples at the time  
149 of collection, some of which are now invalid (White *et al.*, 2017).

150

## 151 Results

### 152 Monophyly and clustering

153 Maximum Likelihood phylogenetic trees based on two genome-wide SNP data matrices (hereafter  
154 referred to as datasets p10 and p90, see Supplementary Table 2 for details) of varying size displayed  
155 highly congruent patterns (Figure 2 and Supplementary Figure 1). These trees represent the most  
156 comprehensive phylogenetic trees in terms of numbers of individuals and geographic coverage for  
157 mobulid rays published to date. Putative species fall into reciprocally monophyletic groups with high  
158 bootstrap support, and these species groups fall into well supported clades separated by long branch  
159 lengths. *Mobula japonica* and *Mobula mobular* form a single monophyletic group with 100% bootstrap  
160 support. In contrast, *Mobula kuhlii* and *Mobula eregoodootenkee* were resolved into two distinct

161 monophyletic groups, each with 100% bootstrap support. Furthermore, two distinct monophyletic  
162 groups are reported within *M. kuhlii*; each with 100% bootstrap support (based on dataset p10)  
163 corresponding to individuals sampled in the West (South Africa) and East (Sri Lanka eastwards) Indian  
164 Ocean. Finally, the manta rays can be resolved into distinct monophyletic groups corresponding to *M.*  
165 *alfredi* and *M. birostris*. Within *M. alfredi*, two well supported groups that correspond to Indian and  
166 Pacific Ocean populations are observed, whilst *M. birostris* is split into two groups; an Atlantic and a  
167 global group. One individual (sampled in Flower Garden Banks National Marine Sanctuary) was noted  
168 to switch between *M. birostris* clades depending on the data matrix used and was placed outside each  
169 main group with low bootstrap support (69% for dataset p10).

170 Principal Components Analyses (PCA) were carried out on each of the clades referred to above using  
171 dataset p10 (Figure 3; see Supplementary Table 3 for details of SNPs retained following division of  
172 data into clades). For the manta rays (Figure 3A & B), the first principal component (hereafter PC)  
173 separates *M. alfredi* from *M. birostris*, whilst the second PC distinguishes between *M. birostris*, and a  
174 possible third species of manta ray. The third PC provides clear distinction between *M. alfredi* from  
175 the Indian and Pacific Oceans ( $F_{ST} = 0.162$ ). The screeplot shows a steep decline in the amount of  
176 variation shown by each axis (Supplementary Figure 2A-B). For *M. mobular* and *M. japanica* (Figure  
177 3C & D), there is no clear separation between the two putative species, although the first PC does  
178 provide some evidence to suggest a clustering of individuals into Indo-Pacific and Atlantic (including  
179 Mediterranean individuals) groups ( $F_{ST} = 0.061$ ). The screeplot for this clade shows a much shallower  
180 decline, and the amount of variation explained by each axis is much lower than for other clades  
181 (Supplementary Figure 2C-D). For the *M. thurstoni*, *M. kuhlii* and *M. eregoodootenkee* group (Figure  
182 3E & F), these three species are very clearly differentiated on the first and second PCs, and this  
183 variation is reflected in the corresponding screeplot (Supplementary Figure 2E-F). The third PC reflects  
184 the geographic separation of *M. kuhlii* referred to above ( $F_{ST} = 0.319$ ). For *M. hypostoma* and *M.*  
185 *munkiana* (Figure 3G & H), only the first PC was found to represent a large portion of the variation in  
186 the data (Supplementary Figure 2G-H), which corresponds to the separation of individuals into *M.*  
187 *hypostoma* and *M. munkiana*.

188

### 189 **COI gene phylogeny**

190 A Maximum Likelihood tree of mobulid species built using COI sequences is presented in  
191 Supplementary Figure 3. COI sequencing was unable to resolve the two manta ray species (*M. alfredi*  
192 and *M. birostris*), into monophyletic groups, and failed to resolve *M. kuhlii* and *M. eregoodootenkee*.  
193 Several species were resolved into reciprocally monophyletic groups with high bootstrap support (*M.*

194 *tarapacana*, *M. mobular*, *M. hypostoma* and *M. munkiana*), but several multifurcating nodes within  
 195 the tree indicate poor resolution achieved with this dataset.

196

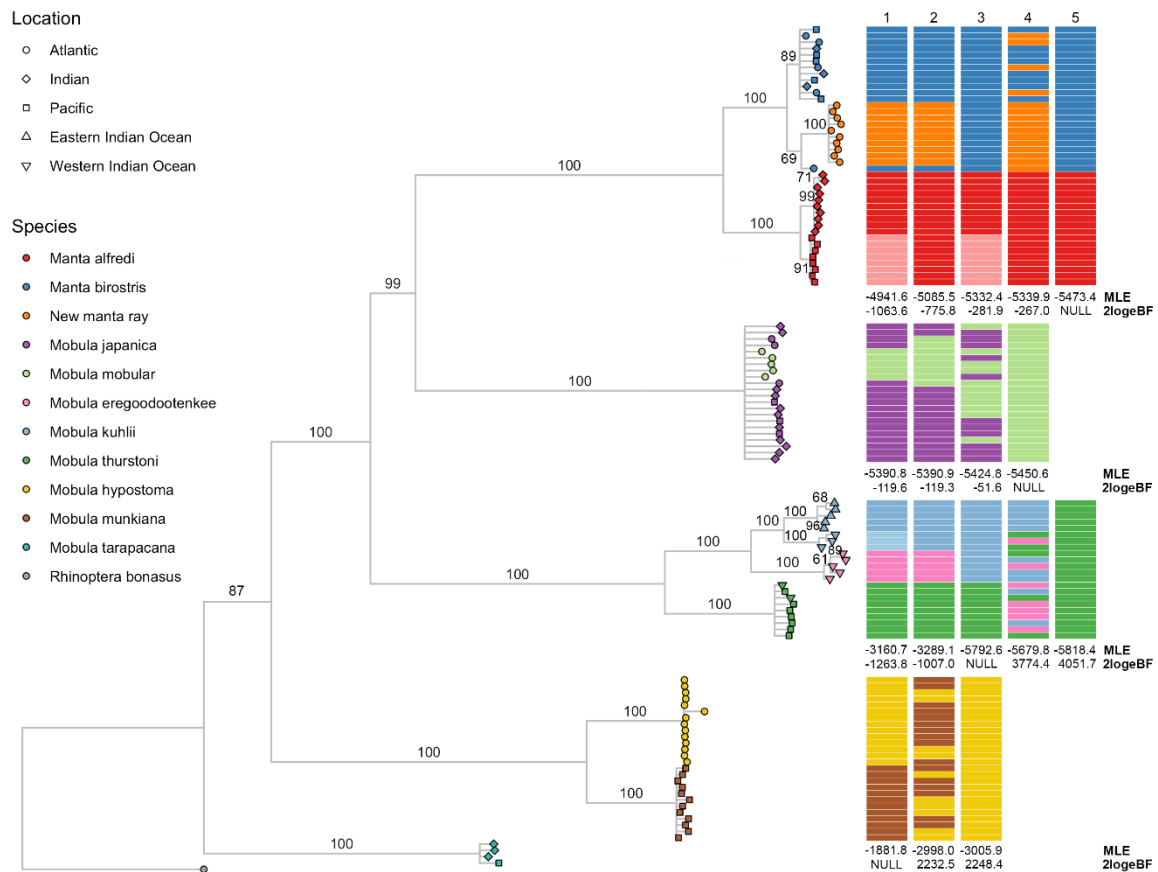

197

198 Figure 2: Maximum Likelihood Phylogenetic Tree of mobulid species based on dataset p10 (left). Tips  
 199 represent individuals, with colour indicating species, and shape the geographic origin of the sample as  
 200 indicated in the legend. Bootstrap values are shown on the branches. Nodes with less than 50%  
 201 bootstrap support are collapsed. Bayes Factor Delimitation (BFD\*) models are also presented (right)  
 202 where individuals are assigned to species as indicated by coloured bars. Models are ranked in order  
 203 of performance from left to right. Marginal Likelihood Estimates (MLE) and Bayes Factors (2log<sub>e</sub>BF) for  
 204 runs with a gamma prior on lambda, relative to the null model are shown beneath each model. See  
 205 Supplementary Table 4 for MLEs and 2log<sub>e</sub>BF for runs with alternative prior combinations. Models that  
 206 included individuals from the sister clade are not shown, as these consistently performed poorly. Note  
 207 that we use species names that were assigned to samples at the time of collection, some of which are  
 208 now invalid (White *et al.*, 2017).

209



210

211

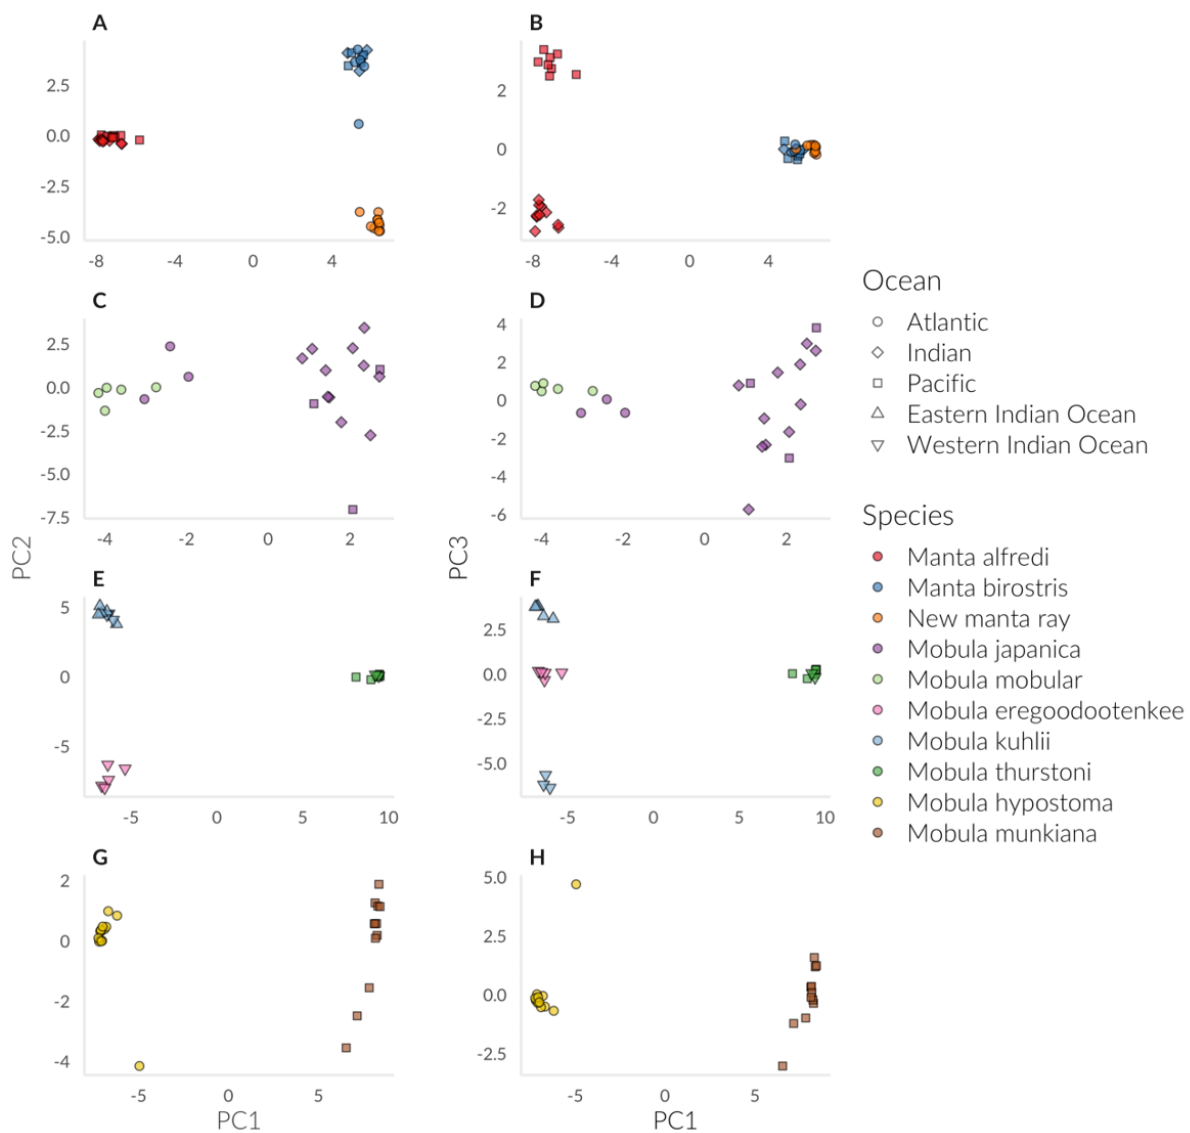

212

213 Figure 3: Principle Components 1-3 plotted for each mobulid clade. Putative species are represented  
214 with colours, and shape represents the geographical location of sampling as indicated in the legend.  
215 A) manta rays, PC1 and 2, B) manta rays, PC1 and 3, C) *M. mobular* and *M. japanica*, PC1 and 2, D) *M.*  
216 *mobular* and *M. japanica*, PC1 and 3, E) *M. thurstoni*, *M. kuhlii* and *M. eregoodootenkee*, PC1 and 2,  
217 F) *M. thurstoni*, *M. kuhlii* and *M. eregoodootenkee*, PC1 and 3, G) *M. hypostoma* and *M. munkiana*,  
218 PC1 and 2, H) *M. hypostoma* and *M. munkiana*, PC1 and 3. Note that we use species names that were  
219 assigned to samples at the time of collection, some of which are now invalid (White *et al.*, 2017).

220

221



## 222 **Species Delimitation**

223 Species models (see Supplementary Table 4 for details) were tested following the Bayes Factor  
224 Delimitation with genomic data (BFD\*) method of Leache et al. (2014), and Bayes Factors calculated  
225 relative to a null model of mobulid species as defined by White et al. (2017). Marginal Likelihood  
226 estimates did not differ considerably between chains with different priors on lambda (Supplementary  
227 Table 4). For the manta rays (Figure 2), we find decisive support for models that recognise the Gulf of  
228 Mexico and global *M. birostris* clades referred to above as two separate species ( $2\log_e\text{BF} = -775.82$ ),  
229 and that recognise geographically separated populations of *M. alfredi* as separate species ( $2\log_e\text{BF} = -$   
230  $1063.58$ ).

231 The *M. mobular* and *M. japanica* clade was best described by models that were more similar in their  
232 performance (Figure 2). The null model performed poorly in comparison to three models that split  
233 individuals based on geographical information (indeed, prior to White et al. (2017); *M. mobular* was  
234 considered to be restricted to the Mediterranean Sea, whilst *M. japanica* was considered  
235 circumglobal). The model that split individuals into these two previously recognised species performed  
236 best ( $2\log_e\text{BF} = -119.58$  relative to null model) but was only marginally better than a model that split  
237 individuals into Atlantic (including the Mediterranean) and Indo-Pacific groups ( $2\log_e\text{BF} = -119.34$   
238 relative to null model).

239 Decisive support was found for the *M. thurstoni*, *M. kuhlii* and *M. eregoodootenkee* clade (Figure 2),  
240 in models that resurrect *M. eregoodootenkee* as a valid species, and that further split *M. kuhlii* based  
241 on geographical information ( $2\log_e\text{BF} = -1007.04$  and  $-1263.8$  respectively).

242 Finally, within the *M. hypostoma* and *M. munkiana* clade, we find decisive support for the null model,  
243 that recognises *M. hypostoma* and *M. munkiana* as distinct species (Figure 2).

244 In all clades, models assessing support for interaction from higher up the tree, as well as models testing  
245 random assignment of individuals to species, perform comparatively poorly (Supplementary Table 4).

246

## 247 **Relationships among the Mobulidae**

248 Maximum Likelihood trees using the two species level data matrices containing varying amounts of  
249 missing data were highly congruent (Figure 4 and Supplementary Figure 4). Both data matrices support  
250 the findings of White et al. (2017); that manta rays are nested within *Mobula*, and sister to *M. mobular*  
251 ( $\geq 95\%$  bootstrap support) and hereafter all species of manta ray are referred to with genus name  
252 *Mobula*. In addition, these trees strongly suggest that the undescribed third species of manta ray is

253 most closely related to *M. birostris* (100% bootstrap support). Finally, *M. tarapacana* is tentatively  
254 placed on the first lineage to diverge from the remaining Mobulidae (84% bootstrap support with  
255 dataset p10).

256

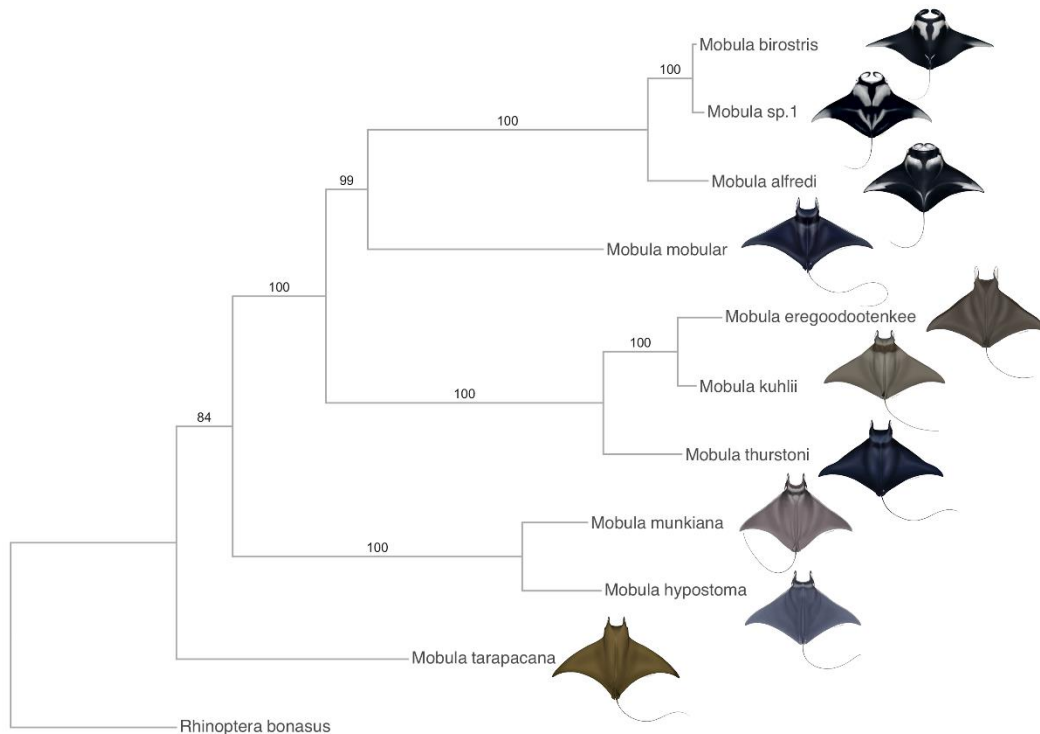

257

258 Figure 4: Maximum Likelihood tree of mobulid species based on dataset p10. Bootstrap values are  
259 shown on the branches. Illustrations © Marc Dando. The drawing of *Mobula* sp. 1 is based on images  
260 of dozens of individuals off the Yucatan Peninsula, Gulf of Mexico.

261

262 With respect to Bayesian tree estimation under the multispecies coalescent, the consensus tree  
263 topology and estimates of theta were relatively consistent across independent runs that included  
264 different individuals from each species (Supplementary Table 5). This suggests that there was no major  
265 effect of subsampling on topology of the species trees inferred with SNAPP. In trees inferred with  
266 SNAPP, *M. tarapacana* was consistently placed within a clade separate to the ingroup of *M. hypostoma*  
267 and *M. munkiana* (highest posterior density (HPD) = 1.0). Other nodes within the tree were generally  
268 poorly supported. This topological uncertainty is apparent when visualised as a cloudogram of gene  
269 trees sampled from the posterior distribution (Figure 5 and Supplementary Figures 5-7). The number  
270 of alternative topologies inferred per subsampling and within the 95% HPD ranged from 9-25  
271 (Supplementary Table 6). In all inferred topologies within the 95% HPD, the topology within the clades

272 separated by long branches, previously discussed, remains the same, and the main difference was the  
273 placement of *M. mobular* relative to the other clades.

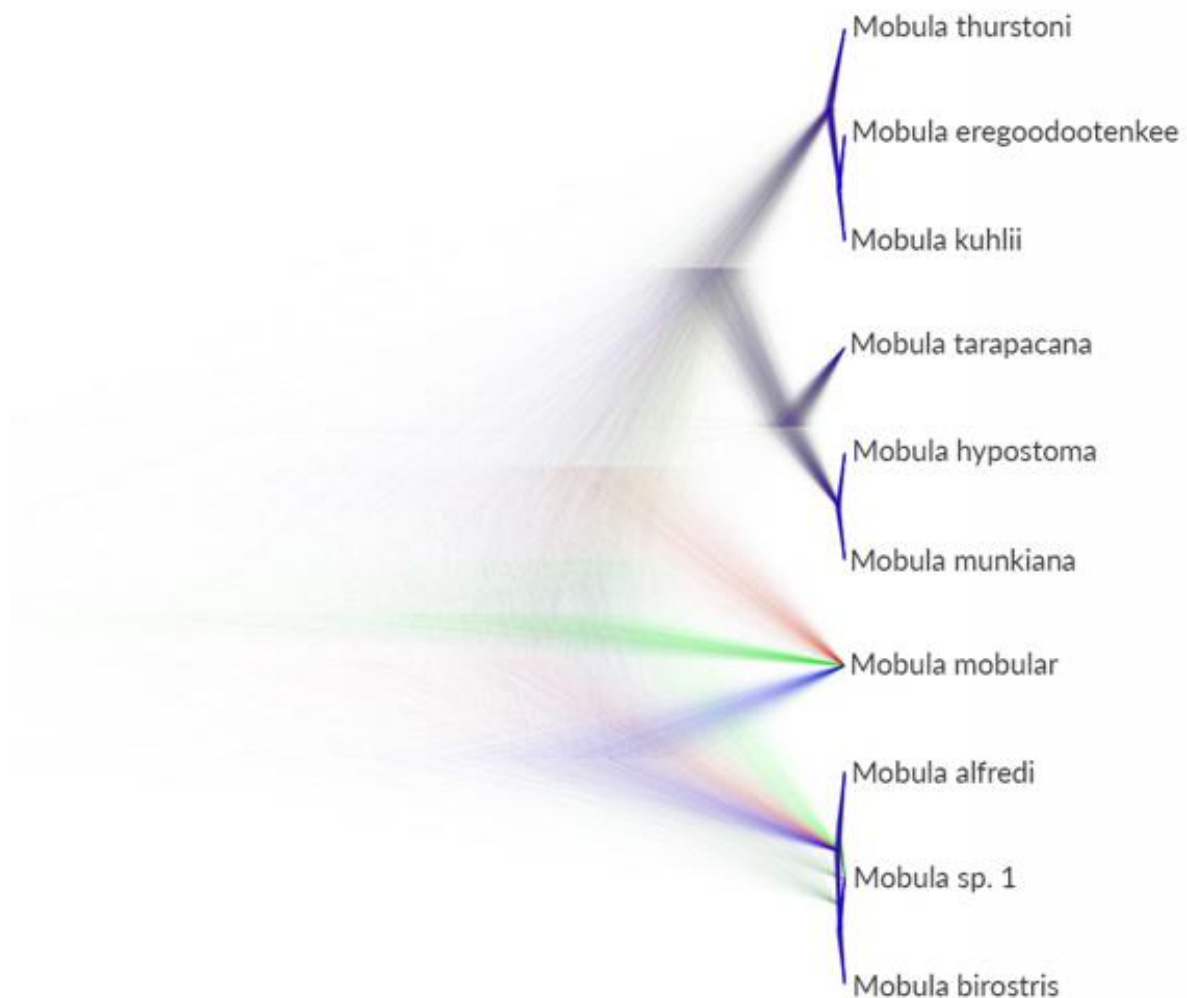

274

275 Figure 5: SNP phylogeny of 30 individuals assigned to ten species based on dataset p90, individual  
276 subsample 1 (see Supplementary Table 5 for details). Tree cloud produced using DENSITREE of  
277 sampled trees (representing samples taken every 1000 MCMC steps from 5,000,000 iterations) from  
278 SNAPP analysis to visualise the range of alternative topologies.

279

280 TreeMix inferred an admixture graph with the same topology as that inferred with RAxML (see  
281 Supplementary Figure 8). This model was found to explain 99.86% of the variance in the data,  
282 indicating that species placement is unaffected by admixture, where species may be more closely  
283 related than the tree suggests, or where species may be forced closer together due to unmodeled  
284 migration (Pickrell and Pritchard, 2012). Furthermore, three-population tests were all positive

285 (Supplementary Table 7). We therefore found no evidence of introgression between clades containing  
286 *M. alfredi*, *M. mobular* and *M. thurstoni*.

287

## 288 Discussion

289 Our analyses of a globally and taxonomically comprehensive set of mobulid tissue samples produced  
290 the most extensive phylogeny for the Mobulidae to date. Genome-wide SNP data provided a high  
291 degree of resolution compared to analysis of a single gene. Combined with results from analyses based  
292 on the multispecies coalescent, our findings provide robust support for several changes to be made  
293 to mobulid taxonomy, including the recognition of a new species of manta ray, and have implications  
294 for management, conservation and law enforcement.

295 It is important to recognise speciation as a continuous process, where lineage splitting does not  
296 necessarily correspond to speciation events. When this is explicitly modelled, the multispecies  
297 coalescent has been shown to overestimate species numbers, recovering all structure both at the level  
298 of the species and the population (Sukumaran and Knowles, 2017). In contrast to previous studies of  
299 mobulid taxonomy, the global nature of our dataset allows for this conflict to be resolved, where in  
300 many cases, individuals from pairs of putative species are sampled within sites, thereby allowing this  
301 distinction to be made.

302 We find strong evidence supporting the existence of a third, undescribed species of manta ray in the  
303 Gulf of Mexico (hereafter referred to as '*Mobula* sp. 1'). Samples were collected at two sites within  
304 the Gulf of Mexico; offshore of the Yucatan Peninsula and Flower Garden Banks National Marine  
305 Sanctuary, and were provisionally identified as *M. birostris*. When these Gulf of Mexico samples were  
306 analysed alongside *M. birostris* samples collected elsewhere (Sri Lanka, Philippines and Mexico  
307 Pacific), individuals were found to fall within two distinct groups; one containing only individuals from  
308 the Gulf of Mexico sites, and the other containing additional individuals from the same Gulf of Mexico  
309 sites as well as *M. birostris* individuals sampled elsewhere. In addition, we find decisive support for  
310 two models which recognise these groups as distinct species through Bayes Factor Delimitation (BFD\*;  
311 Figure 2). Given that samples from both groups were collected within Gulf of Mexico sites, *M. birostris*  
312 can be considered to occur in sympatry with *Mobula* sp. 1, constituting separately evolving lineages  
313 (De Queiroz, 2007). Monophyly of groups supports these as separate species under the phylogenetic  
314 species concept (Frankham *et al.*, 2012). Furthermore, sympatry of populations suggests reproductive  
315 isolation driven either by a factor other than geographical separation, or historical separation followed  
316 by modern secondary contact (as hypothesised by Hinojosa-Alvarez *et al.* (2016)), and these species

317 are therefore further supported under the Biological Species concept (Frankham *et al.*, 2012). In  
318 addition, we report on a single individual which could be considered as genetically intermediate  
319 between the two groups (Figures 2 and 3), indicating that hybridisation may occur between the two  
320 species, as between *M. alfredi* and *M. birostris* (Walter *et al.*, 2014).

321 Novel mtDNA haplotypes have previously been reported from manta rays off the Yucatan Peninsula,  
322 and a speciation event hypothesised (Hinojosa-Alvarez *et al.*, 2016), in addition to previous  
323 morphological observations (Marshall *et al.*, 2009). Our study is the first analyses of genome-wide  
324 data to suggest that there are two species of manta ray present in the Gulf of Mexico; a finding that  
325 is consistent with previous studies (Hinojosa-Alvarez *et al.*, 2016; Stewart *et al.*, 2018b). Monophyly  
326 of groups indicate that some *M. birostris* individuals using sites in the Gulf of Mexico are more closely  
327 related to *M. birostris* in Sri Lanka and the Philippines than to individuals of *Mobula* sp. 1 using those  
328 same Gulf of Mexico sites. It is likely that these species occur in a state of mosaic sympatry, as with *M.*  
329 *alfredi* and *M. birostris* elsewhere (Kashiwagi *et al.*, 2011). For effective conservation it will be  
330 necessary to formally describe this new species and determine the extent of its range.

331 A recent taxonomic review concluded that *M. eregoodootenkee* is a junior synonym of *M. kuhlii* based  
332 on mitogenome and nuclear data for a single sample per putative species (White *et al.*, 2017). In direct  
333 contrast, our phylogenetic analysis of genome-wide SNPs which included multiple individuals per  
334 species from multiple geographic locations, placed individuals of *M. kuhlii* and *M. eregoodootenkee*  
335 into discrete monophyletic clades with very high bootstrap support (Figure 2). This pattern was also  
336 mirrored in the results of our Principal Components Analysis (Figure 3). In addition, BFD\* models that  
337 recognised *M. eregoodootenkee* as a distinct species from *M. kuhlii* are consistently favoured over the  
338 null model (Figure 2). Given that both species groups included samples that were collected within the  
339 same ~120km stretch of South African coastline, the divergence reported here between *M. kuhlii* and  
340 *M. eregoodootenkee* cannot be attributed to geographic population structure (Sukumaran and  
341 Knowles, 2017). There is evidence to suggest that periods of speciation within the Mobulidae  
342 correspond to episodes of global warming and associated changes in upwelling intensity and  
343 productivity, and it is hypothesized that this led to fragmentation and subsequent divergence with  
344 respect to feeding strategies (Poortvliet *et al.*, 2015). Differences in morphology between *M. kuhlii*  
345 and *M. eregoodootenkee* (Notarbartolo Di Sciarra, 1987; Notarbartolo di Sciarra *et al.*, 2017), and  
346 particularly the suggestion of differences in the length of the cephalic fins and gill plate morphology  
347 (Paig-Tran *et al.*, 2013), that relate directly to the filter feeding strategy of mobulid rays, may lend  
348 support to this hypothesis. Notwithstanding, the present study provides the best available evidence  
349 regarding the species status of this group, and as such we resurrect *Mobula eregoodootenkee* as a  
350 distinct species.

351 In agreement with the conclusion of White et al. (2017), we find no evidence to support *M. japonica*  
352 as a distinct species to *M. mobular*. Individuals provisionally identified as *M. mobular* as it was formerly  
353 recognised (with a distribution that was restricted to the Mediterranean Sea), do not form a  
354 reciprocally monophyletic group to the exclusion of individuals belonging to *M. japonica* (a species  
355 previously considered to be circumglobally distributed with the exception of the Mediterranean Sea),  
356 and instead these individuals form a single clade, with high bootstrap support (Figure 2). Clustering  
357 analyses indicate a degree of population structure, with some modest differentiation between Indo-  
358 Pacific and Atlantic (including Mediterranean) groups ( $F_{ST} = 0.06$ ). Results from BFD\* are far less  
359 conclusive than those for other clades (Figure 2), and support for split models being driven by  
360 geographic segregation of populations cannot be ruled out (Sukumaran and Knowles, 2017). We  
361 therefore uphold *M. mobular* as a single species, with *M. japonica* considered a junior synonym of the  
362 same.

363 With respect to species delimitation of the final clade examined, we find strong evidence to support  
364 *M. hypostoma* and *M. munkiana* as distinct species (Figures 2 and 3). Whilst these species are  
365 geographically segregated in the Atlantic and Eastern Pacific Oceans respectively, the divergence is of  
366 a similar magnitude to that of other species groups within the Mobulidae (Figures 2 and 3,  
367 Supplementary Figure 2) and morphological differences between the two species are considered  
368 sufficient to recognise two species (Notarbartolo Di Sciara 1987; Stevens et al. 2018). As such we find  
369 no evidence to support any modification to the taxonomy of this clade.

370 Previous studies found morphological differences sufficient to consider *M. rochebrunei* (a pygmy devil  
371 ray species described off the coast of West Africa) a distinct species (Cadenat, 1960); summarised in  
372 Notarbartolo Di Sciara (1987). In this study, we were unable to generate molecular data representing  
373 *M. rochebrunei* (now considered to be a junior synonym of *M. hypostoma* (White et al., 2017)).  
374 However, the revision published by White et al. (2017) is based on low mitochondrial sequence  
375 divergence between single representative samples of the two putative species, and is consistent with  
376 sequence divergence estimates for other mobulid groups where further study has resolved separate  
377 species status: *M. alfredi* and *M. birostris* (Marshall et al., 2009; Kashiwagi et al., 2012; this study), and  
378 *M. kuhlii* and *M. eregoodootenkee* (this study). Therefore, given the high vulnerability to extinction  
379 which exists for any mobulid species with a restricted range in this region (Atta-Mills et al., 2004;  
380 Doumbouya 2009) efforts to resolve this taxonomic uncertainty should be given a high priority (see  
381 Stewart 2018a).

382 Through phylogenetic and clustering analyses, we identify substantial geographically-mediated  
383 population structure within *M. kuhlii* and *M. alfredi*. In both cases, individuals fall into monophyletic

384 groups corresponding to the East and West Indian Ocean ( $F_{ST} = 0.32$ ), and Indian and Pacific Oceans  
385 ( $F_{ST} = 0.16$ ), respectively, with high bootstrap support. This pattern is consistent in our clustering  
386 analysis, and BFD\* supports models that recognise these populations as distinct species. Indeed, there  
387 are anecdotal suggestions of morphological differences occurring in *M. kuhlii* across the Indian Ocean  
388 (Stevens *et al.*, 2018). However, given that we cannot rule out a geographic driver of these patterns,  
389 *M. kuhlii* and *M. alfredi* must currently be maintained as singular species. Further study is required to  
390 investigate this pattern, and to assess the population genetic structure of both species to support  
391 effective management.

392 The inference of relationships within the Mobulidae provided largely congruent results across  
393 Maximum Likelihood and Bayesian analyses, with an exception of the placement of *M. tarapacana*.  
394 Our ML analysis placed *M. tarapacana* on the oldest mobulid lineage, as result consistent with similar  
395 ML analysis based on nuclear data (White *et al.*, 2017). Yet our Bayesian analyses consistently placed  
396 *M. tarapacana* as sister species to *M. hypostoma* and *M. munkiana*. Analyses employing  
397 mitochondrial data support *M. tarapacana* as a sister species to the manta rays and *M. mobular*  
398 (Poortvliet *et al.*, 2015; White *et al.*, 2017), an observation that we were unable to reproduce with our  
399 data. Discordant trees in phylogenomic studies may be attributed to a small number of genes or loci,  
400 either driven by positive selection resulting in convergent evolution, or by evolutionary processes such  
401 as incomplete lineage sorting or hybridisation (Shen *et al.*, 2017). Coalescent-based approaches, such  
402 as the independent analysis of unlinked SNPs completed here, account for each gene trees history,  
403 and are therefore less likely to be influenced by single genes (Shen *et al.*, 2017), lending support to  
404 the hypothesis that *M. tarapacana* is sister to *M. hypostoma* and *M. munkiana*.

405 Application of a multispecies coalescent-based approach to our data allowed visualisation of the  
406 uncertainty in species tree topology and incomplete lineage sorting. Our Maximum Likelihood  
407 phylogenetic analysis indicates that the previously recognised genus *Manta* is nested within *Mobula*,  
408 and provides further justification for the associated change in nomenclature implemented by White  
409 *et al.* (2017). However, concatenated approaches can be prone to converge to an incorrect phylogeny  
410 (Kubatko and Degnan, 2007), whilst ignoring heterozygous sites can effect estimates of divergence  
411 times (Lischer *et al.*, 2014). Whilst our Bayesian multispecies coalescent analyses do not specifically  
412 refute the observation that *Manta* is nested within *Mobula*, we find substantial uncertainty in the  
413 placement of *M. mobular*. Trees within the 95% HPD that place *M. mobular* with the manta rays are  
414 present in approximately equal proportions to trees placing the species with the remaining devil rays  
415 (Supplementary Table 6), thereby producing trees where the two formerly recognised genera are  
416 reciprocally monophyletic. In groups that have undergone a rapid speciation process and had large  
417 ancestral effective population size, the effects of incomplete lineage sorting on species tree estimation



418 are particularly prominent (Flouri *et al.*, 2018). The Mobulidae are known to have undergone recent  
419 rapid bursts of speciation (Poortvliet *et al.*, 2015), and our estimates of theta (mutation-scaled  
420 effective population size), were larger on the deeper branches of the tree reflecting the large effective  
421 population size of the extinct shared ancestral species of the contentious extant taxa (Supplementary  
422 Figure 9). Thus, standing variation in ancestral populations of mobulid rays is likely to drive taxonomic  
423 uncertainty with respect to the validity of *Manta* as a genus. Since there is no evidence of admixture  
424 driving these patterns (Supplementary Table 7), this uncertainty can be attributed to incomplete  
425 lineage sorting. Given that recently separated populations or species will pass through stages of  
426 polyphyly and paraphyly before becoming reciprocally monophyletic in the absence of additional  
427 introgression (Avice 1990; Patton and Smith, 1994), it is reasonable to hypothesise we are observing  
428 this process here. Based on current information however, we support *Mobula alfredi* and *Mobula*  
429 *birostris* as being taxonomically valid (White *et al.*, 2017).

430 Our proposed changes to the taxonomy of the mobulid rays will have profound implications for  
431 practical conservation of the Mobulidae on an international scale, as conventions designed to regulate  
432 and effect conservation measures rely on systematic review at the species level (Shafer *et al.*, 2015).  
433 Furthermore, many of these administrations rely on experts to evaluate the literature and assess  
434 priorities for species conservation, for example, under the IUCN's Red List framework. Of particular  
435 importance from this study is the distinction of *M. eregoodootenkee* from *M. kuhlii*, given that they  
436 share a similar geographic range across a region with intensive fishing pressures (Notarbartolo di  
437 Sciara *et al.*, 2017). Although each species is still treated as a single stock across the Indo-Pacific due  
438 to limited data available on their population structure, inference from related species suggest that  
439 their low reproductive output likely results in population numbers that will not withstand heavy fishing  
440 pressure (Dulvy *et al.*, 2014; Croll *et al.*, 2016). As such, their conservation status would be considered  
441 quite critical, requiring very specific management measures. In contrast, species such as *M. mobular*  
442 will now likely face lower conservation concerns given that *M. japonica* is a junior synonym. However  
443 as with other mobulid species, further investigations into population structure are warranted in order  
444 to conduct clear stock assessments for fisheries management.

445 Similarly, for conservation conventions such as CITES and CMS, and fisheries management bodies,  
446 management plans are drafted and approved at a species level and can severely impact anthropogenic  
447 pressures on a species. It is therefore imperative that decisions on species status are based upon the  
448 best available evidence.

449

## 450 Conclusions

451 This study represents the most comprehensive phylogenomic study in terms of numbers of individuals  
452 and geographic coverage for mobulid rays published to date and makes use of genome-wide SNP data  
453 to evaluate the taxonomy of the group and relationships between species. We present genome-wide  
454 evidence to support ten species within the Mobulidae: *Mobula alfredi*, *Mobula birostris*, *Mobula*  
455 *mobular*, *Mobula thurstoni*, *Mobula kuhlii*, *Mobula eregoodootenkee*, *Mobula hypostoma*, *Mobula*  
456 *munkiana*, *Mobula tarapacana* and a currently undescribed species of manta ray (*Mobula* sp. 1) in the  
457 Gulf of Mexico. In addition, we advocate the recognition of *Mobula rochebrunei* for conservation  
458 purposes until more data is available. We emphatically urge policy-makers, particularly the large  
459 conventions (such as the CITES and CMS) and the relevant specialist group within the IUCN to evaluate  
460 these as separate units in their assessments and when implementing conservation policy.

461 Future work in this area will necessarily involve formal description of the third species of manta ray  
462 (*Mobula* sp. 1), shown here to be present in the Gulf of Mexico. In addition, population level studies  
463 on individual species will allow more informed management by delineating conservation units. In the  
464 case of the Mobulidae, a group known to be vulnerable to overexploitation, assessment of stock  
465 structure within fisheries will allow for effective management.

466 This significant increase in the resolution of species diversity within the global evolutionary radiation  
467 of the Mobulidae was achieved through an international collaboration of researchers, contributing to  
468 a global collection of representative samples, combining multiple genome-wide markers with a  
469 combinatorial approach to data analysis. As such, the study provides a framework for molecular  
470 genetic species delimitation which is relevant to other wide-ranging taxa of conservation concern and  
471 highlights the potential for applied research to support conservation, management and law  
472 enforcement.

473

## 474 Materials and Methods

### 475 **Sample collection, DNA extraction and Sanger sequencing**

476 Tissue samples were collected representing all described species of mobulid ray, including the recently  
477 invalid species' *Mobula japonica*, *Mobula eregoodootenkee* and *Mobula rochebrunei*, currently  
478 considered to be junior synonyms of *Mobula mobular*, *Mobula kuhlii* and *Mobula hypostoma*  
479 respectively (White *et al.*, 2017), and an outgroup species, *Rhinoptera bonasus*. Where possible,  
480 samples were collected from a broad geographical range, and with multiple samples per site. Samples

481 were identified to species level based on morphological characters described in Stevens et al. (2018).  
482 Samples included in the analyses described below (those yielding high quality DNA), totalling 20  
483 countries and 31 sites, are shown in Figure 1, and details given in Supplementary Table 1. We use the  
484 original species names that were assigned to samples at the time of collection, some of which are now  
485 considered invalid following White et al. (2017).

486 Genomic DNA was extracted using the Qiagen DNeasy Blood and Tissue Kit following the  
487 manufacturer's instructions and eluted in nuclease-free water. DNA yield was measured using a Qubit  
488 3.0 Broad Range Assay, and quality assessed on a 1% agarose gel stained with SafeView. The single  
489 sample of *Mobula rochebrunei*, from the Musee de la Mer, Goree, Senegal, had been stored in  
490 formalin, yielded no detectable DNA, and was therefore not sequenced.

491 To investigate the utility of traditional markers for mobulid species delimitation, PCR amplification of  
492 an approximately 650bp portion of the COI gene was carried out using universal Fish primers (Ward  
493 *et al.*, 2005) or, where these primers failed to amplify, as was the case for *M. munkiana* and *M.*  
494 *hypostoma* samples, primers MunkF1 (GGGATAGTGGGTACTGGCCT) and MunkR1  
495 (AGGCGACTACGTGGGAGATT) were designed in-house using Primer-BLAST (Ye *et al.*, 2012). PCR was  
496 carried out in 15µl reactions, consisting of: 5.6µl nuclease-free water, 7.5µl of ReddyMix PCR Master  
497 Mix (ThermoFisher), 0.45µl of each primer, and 1µl DNA. PCR cycling conditions consisted of: 95°C for  
498 2 min, followed by 35 cycles of 94°C for 30s, 54°C for 30s and 72°C for 1 min, with a final extension of  
499 72°C for 10 mins. Sanger sequencing was carried out by Macrogen Europe, and raw sequences edited  
500 using the software Chromas Lite, yielding 110 high quality sequences (see Supplementary Table 1).  
501 Data was imported into MEGA7 (Kumar *et al.*, 2016), aligned using ClustalW, and the alignment  
502 checked for stop codons. The HKY+G model was identified as most suitable for this dataset using the  
503 Find Best Model option in MEGA7, and a Maximum Likelihood tree built with 1000 bootstrap  
504 replicates.

505

#### 506 **ddRAD library preparation and sequencing**

507 ddRAD libraries were prepared in-house using a modified version of the protocol published by  
508 Peterson *et al.* (2012), and fully described in Palaiokostas *et al.* (2015). For each sample, 21ng of  
509 genomic DNA was digested with the restriction enzymes *SbfI* and *SphI* (NEB). Unique P1 and P2  
510 barcode combinations were ligated to the resulting fragments for individual identification before  
511 samples were pooled. DNA fragments between 400 and 700bp were size-selected using gel

512 electrophoresis and PCR amplified. Individual sample replicates within and among libraries were  
513 included to assess error rates following the method described by Mastretta-Yanes *et al.* 2015.

514 A pilot ddRAD library was sequenced on the Illumina MiSeq at the Institute of Aquaculture, University  
515 of Stirling. Subsequent ddRAD libraries were sequenced by Edinburgh Genomics, University of  
516 Edinburgh on Illumina HiSeq High Output v4, with the 2 x 125PE read module.

517

### 518 **Data quality control and filtering**

519 Data quality was assessed with FastQC software (Andrews 2010) with particular interest in the per  
520 base sequence quality module for SNP calling and the overrepresented sequences module to check  
521 for adapter contamination. Stacks (version 1.46; (Catchen *et al.*, 2011)) was used for demultiplexing,  
522 quality filtering and assembling raw read data. Data were demultiplexed using the `process_radtags.pl`  
523 module and due to an indication of adapter contamination, adapter sequences were filtered out at  
524 this stage, with two mismatches allowed in the adapter sequence. In addition, the score limit was  
525 raised to 20 (99% probability) within the `process_radtags` sliding window to remove low quality  
526 sequence reads. Reads with an uncalled base were also discarded at this stage.

527 To minimise the level of linkage in our SNP data, only forward reads were included in the next stages  
528 of analysis. To remove any short fragments that were not successfully filtered out at the size-selection  
529 stage of the wet-lab protocol, a custom bash script was used to remove any sequence reads that  
530 contained a cut site for the *SphI* enzyme. This amounted to 8.5% of reads across samples.

531 In order to assemble loci and call SNPs, the `denovomap.pl` program was executed in Stacks (Catchen  
532 *et al.*, 2011). The three main parameters for assembly were set as those that generated the largest  
533 number of new polymorphic loci shared across 80% of individuals, following the method for parameter  
534 testing described by Paris *et al.* (2017). Four identical reads were required to build a stack (-m), stacks  
535 that differed by up to four nucleotides were merged into putative loci (-M) and putative loci across  
536 individuals that differed by up to five nucleotides were written to the catalog (-n). This resulted in an  
537 average coverage of 105x across loci and samples. Allele and SNP error rates, as defined by Mastretta-  
538 Yanes *et al.* (2015), were below 6% and 2.5% respectively.

539 To generate a SNP matrix at the individual level, the `populations.pl` program in Stacks (Catchen *et al.*,  
540 2011) was used to output a VCF file containing all discovered SNPs across every polymorphic locus  
541 that was shared across more than a specified minimum number of individuals (10 or 90). This  
542 generated two matrices of varying size and with varying levels of missing data (see Supplementary  
543 Table 2). In order to remove possible paralogous loci from these matrices, VCFtools (Danecek *et al.*,

544 2011) was used to generate information on the average coverage at each locus across individuals.  
545 Those loci that were sequenced at more than double the standard deviation of coverage were  
546 assumed likely to be paralogous loci and were excluded. In addition, loci that were sequenced at less  
547 than one-third the standard deviation of coverage were excluded to mitigate for the effects of allele  
548 dropout (Arnold *et al.*, 2013; Gautier *et al.*, 2013). Moreover, loci were assessed for excess  
549 heterozygosity due to mapping artefacts, where those loci that were identified as having a high  
550 probability of heterozygote excess in one or more species were excluded from the entire dataset.  
551 Finally, to exclude erroneous SNPs called due to indels in the sequence, that are not accounted for in  
552 Stacks, any SNP in the last five nucleotide positions was excluded. To output final quality controlled  
553 SNP matrices for downstream analysis, the remaining loci and SNPs were written to a whitelist, and  
554 passed back to the populations.pl program in Stacks (Catchen *et al.*, 2011). The `-write_random_snp`  
555 option was enabled at this stage to output a single random SNP per locus, thereby minimising the risk  
556 of genetic linkage, since this is a fundamental assumption of some of our downstream analyses. This  
557 resulted in two final matrices, p10 and p90, with 7926 and 1762 SNPs and 47.1% and 14% missing data  
558 respectively (summarised in Supplementary Table 2).

559 At the species level, these same whitelists were passed to populations.pl along with a population map  
560 assigning individuals to species based on the best-supported species model. The resultant matrices  
561 (summarised in Supplementary Table 2) were used for the species level analyses described below.  
562 Reduced numbers of SNPs reported are due to a population (or species in this case) having  
563 incompatible loci – those with more than two alleles – which becomes possible when grouping  
564 individuals together.

565

#### 566 **Assessment of monophyly and clustering**

567 To infer relationships among mobulid individuals, Maximum Likelihood (ML) phylogenetic analysis was  
568 carried out on concatenated ddRAD loci using RAxML version 8.2.11 (Stamatakis 2014). Analyses were  
569 run for both datasets since missing data is known to influence aspects of phylogenetic inference such  
570 as branch length (Leaché *et al.*, 2015). The GTRGAMMA model of rate heterogeneity was implemented  
571 following assessment of best fit models in jModelTest (Darriba *et al.*, 2015). Support for clades was  
572 assessed with 1000 bootstrap replicates and *Rhinoptera bonasus* was used as the outgroup to root  
573 the tree.

574 Once clades had been delimited with RAxML, the data were split into four groups, corresponding to  
575 four highly supported clades that were separated by long branch lengths. These four groups

576 correspond to the manta rays (*M. alfredi* and *M. birostris*), *M. mobular* (including specimens identified  
577 as *M. japanica* prior to the taxonomic revision published by (White *et al.*, 2017)), *M. thurstoni* and *M.*  
578 *kuhlii* (including specimens identified as *M. eregoodootenkee* prior to the taxonomic revision  
579 published by (White *et al.*, 2017)) and *M. hypostoma* and *M. munkiana*. See Supplementary Table 3  
580 for details of numbers of SNPs sampled within each clade.

581 To assess how individuals cluster together, Principal Components Analysis (PCA) was performed on  
582 dataset p10 using the Adegenet package in R (Jombart 2008). After assessment of up to ten axes, three  
583 axes were retained in all cases. The populations.pl program in Stacks (Catchen *et al.*, 2011) was used  
584 to calculate pairwise  $F_{ST}$  values among inferred clusters.

585

### 586 **Bayes Factor Delimitation of species**

587 Species delimitation was carried out using the Bayes Factor Delimitation method with genomic data  
588 (BFD\*) (Leache *et al.*, 2014), which allows for direct comparison of Marginal Likelihood Estimates  
589 (MLE) for alternative species delimitation models under the multispecies coalescent. This analysis was  
590 carried out using the modified version of SNAPP (Bryant *et al.*, 2012), implemented as a plug-in to  
591 BEAST (version 2.4.8; (Bouckaert *et al.*, 2014)). Path sampling was carried out with 10 steps, (1,000,000  
592 MCMC iterations, 20% burnin), implementing the log-likelihood correction available in the program  
593 (Leache *et al.*, 2014). Since marginal likelihood estimates are affected by improper prior distributions,  
594 a gamma distribution was implemented on the lambda (tree height) parameter. To ensure that the  
595 ranking order of models was not affected by the priors, a second round was carried out retaining the  
596 default 1/X distribution on lambda, implementing upper and lower bounds of 10,000 and 0.00001  
597 respectively, so that the prior becomes proper. Bayes Factors ( $2\log_e BF$ ) were calculated from the MLE  
598 from each model for comparison (Kass and Raftery, 1995; Leache *et al.*, 2014), using the formula:

$$599 \quad 2\log_e BF = 2 * (MLE_{null} - MLE_{test})$$

600 Where positive  $2\log_e BF$  values indicate support for the null model, whilst negative BF values favour  
601 the tested model.  $2\log_e BF$  values < 10 are considered decisive support (Leache *et al.*, 2014).

602 Due to the high computational requirements of running SNAPP, this analysis was carried out on the  
603 smaller dataset, p90, and the data was split up into clade specific datasets, as described above. For  
604 each clade however, four random individuals from the sister clade were included, to assess support  
605 for interaction from higher up the tree. See Supplementary Table 4 for details of numbers of SNPs  
606 sampled within each clade.

607 Alternative species delimitation models for each clade were informed both by the literature and by  
608 our own phylogenetic and clustering analyses (see Supplementary Table 4 for details). In addition, a  
609 model that randomly assigns individuals to two or three species was included for each clade, to assess  
610 relative support for other models. In all clades, the null model was considered as those species defined  
611 by White et al. (2017), and all Bayes Factors were calculated relative to this null model.

612

### 613 **Species tree inference**

614 To estimate relationships among the Mobulidae, phylogenetic analyses of individuals belonging to  
615 each of the best supported species was carried out using both Maximum Likelihood and Bayesian  
616 methods. Maximum Likelihood phylogenetic analysis was carried out on concatenated ddRAD loci for  
617 both species-level datasets, as described above for the individual-level datasets.

618 To test the tree topology and evaluate uncertainty, for example, due to incomplete lineage sorting,  
619 species tree inference was also carried out in SNAPP (Bryant *et al.*, 2012), which allows each SNP to  
620 have its own history under the multispecies coalescent whilst bypassing the need to sample each  
621 individual gene tree. Due to the computational constraints associated with running SNAPP on a  
622 dataset as large as ours, dataset p90 was used, and three individuals per species were randomly  
623 selected following (Foote and Morin, 2016), whilst maximising geographical coverage within species.  
624 This process was repeated a further three times, randomly sampling individuals with replacement,  
625 resulting in four subsampled alignments (individual-specific details of each subsample, as well as  
626 details of numbers of SNPs retained with each subsample are provided in Supplementary Table 5).  
627 These four independent runs were carried out with an MCMC chain of 5,000,000 iterations, sampling  
628 every 1000 and retaining default priors on lambda and theta. Similar runs with different prior  
629 combinations produced similar results. Convergence to stationary distributions were assessed by  
630 visual inspection after 20% burnin in TRACER (Rambaut *et al.*, 2018). The distribution of trees was  
631 visualised after 20% burnin in DensiTree (version 2.2.6; (Bouckaert 2010)). The maximum clade  
632 credibility tree was drawn using TreeAnnotator (version 2.4.7; (Bouckaert *et al.*, 2014)).

633 Multi species coalescent approaches, such as SNAPP used in this study, assume that any discordance  
634 of topologies among loci results from incomplete lineage sorting and do not consider introgression as  
635 a source of discordance. Therefore, to investigate the extent to which the variation in these data is  
636 best explained by a single bifurcating tree, TreeMix (Pickrell and Pritchard, 2012) was used to evaluate  
637 whether there is evidence for significant introgression events within the Mobulidae. TreeMix involves  
638 building a maximum likelihood tree of user defined groups and calculating how much of the variance



639 in the data this fixed tree model accounts for. TreeMix was run on dataset p10. Given patterns  
640 observed using SNAPP with respect to uncertainty in the placement of *M. mobular*, the three-  
641 population test (Reich *et al.*, 2009) was additionally used to test for ‘treeness’ between clades. Similar  
642 to TreeMix, the three-population test estimates the covariance of allele frequencies between  
643 populations, but is a simple and less parameterised model than TreeMix, and thus can be a more  
644 powerful tool for identifying introgression. In addition to *M. mobular*, *M. alfredi* and *M. thurstoni* were  
645 randomly chosen from their respective clades for this test.

646

## 647 Acknowledgements

648 We are very grateful to the Save Our Seas Foundation (SOSF) and The People’s Trust for Endangered  
649 Species (PTES) for providing generous support for this work. JH is supported by a NERC CASE  
650 studentship through the ENVISION DTP (CASE partner - Royal Zoological Society of Scotland) and has  
651 received additional grants from the Fisheries Society of the British Isles and the Genetics Society. Data  
652 analysis was supported by the UK Natural Environment Research Council (NERC) Biomolecular Analysis  
653 Facility at the University of Sheffield.

654 The authors are very grateful to the following people and organisations for their help and support  
655 sourcing and collecting tissue samples; Julia L.Y. Spaet, Alec Moore, Rachel Brittain, Akazul, Grace  
656 Phillips, Jon Slayer, Framadou Doumbouya, West Africa Musee de la mer a Dakar, Dan Bowling,  
657 Heather Pacey, the Barefoot Collection, Dr. Bernard Seret, Prof. Dr. D. A. Croll, Kelly Newton, Mr.  
658 Hamid Badar Osmany (Marine Fisheries Department), Silvia Hinojosa, Planeta Oceano, all LAMAVE  
659 staff and volunteers and field team Captains Dean Dougherty, Captain Peter Hull, Captain Greg Byrd,  
660 Krystan Wilkinson and Breanna DeGroot. We would also like to thank all the staff at Atlantis-The Palm  
661 Dubai for giving us access to specimens brought in by fishermen and for their valuable help with data  
662 collection and dissections.

663 Blue Resources Trust (BRT) would like to thank the Department of Wildlife Conservation and the  
664 Department of Fisheries and Aquatic Resources for all their support provided to the field work carried  
665 out in Sri Lanka. BRT also acknowledges the generous support provided by the Save Our Seas  
666 Foundation (SOSF) and the Marine Conservation and Action Fund (MCAF) that enabled field work in  
667 Sri Lanka.

668 We thank Disney Conservation Fund, Save Our Seas Foundation and Mote Scientific Foundation for  
669 supporting sample collection in Florida. Special thanks also to the Local Government Unit of Jagna, the  
670 Philippines Bureau of Fisheries and Aquatic Resources Region 7. The SOSF D’Arros Research Centre is

671 a main affiliate of the Seychelles Manta Ray Project, which is funded by the SOSF. Sample collection  
672 in the Seychelles was approved by, and conducted with the knowledge of, the Ministry of  
673 Environment, Energy, and Climate Change, Seychelles.

674 The National Commission for Fisheries and Aquaculture of Mexico (CONAPESCA) allowed RB the  
675 collection of samples in Mexico through research permit PPF/DGOPA-091/15; the National  
676 Commission for Natural Protected Areas (CONANP) of Mexico and authorities of the Biosphere  
677 Reserve of Whale Sharks, kindly gave permission for work in the reserve. The Save Our Seas  
678 Foundation and the Marine Conservation Action Fund provided funding for research in Mexico. The  
679 Perfect World Foundation generously funded RB for the replacement of a drone used to locate manta  
680 rays. The Mexican CITES authority, Secretary of Environment and Natural Resources (SEMARNAT)  
681 provided CITES export permit for tissue samples through permit MX 80544.

682 We also thank Dr John Taggart for his support with the ddRAD library preparation protocol, and for  
683 his help sequencing a pilot ddRAD library. Gustavo Colucci assisted with DNA extractions and COI  
684 amplifications. In addition, we thank Marc Dando for kindly agreeing for us to reproduce his mobulid  
685 illustrations.

686 AF was funded by the Welsh Government and Higher Education Funding Council for Wales through  
687 the Sêr Cymru National Research Network for Low Carbon, Energy and Environment, and from the  
688 European Union's Horizon 2020 research and innovation programme under the Marie Skłodowska-  
689 Curie grant agreement No. 663830.

690

## 691 Author Contributions

692 JH, EH, GC, MdB, RO, SC and GS designed and conceived of the study and secured funding for  
693 consumables relating to laboratory work. EH, GS, DF, AP, MA, JS, SP, SW, RJ, MP, MM, KBH, RB, JS and  
694 LP were responsible for sourcing and collecting samples. JH, HS and JK carried out laboratory work.  
695 JH, EH, GC, MdB, RO, SC, HH, AF and HS contributed to analysis of genome-wide SNP data. Figures  
696 were designed by EH and JH and produced by EH. All authors contributed to writing and editing the  
697 manuscript.

698

## 699 References

700 Allendorf FW, Hohenlohe PA, Luikart G. 2010. Genomics and the future of conservation genetics.  
701 *Nature Reviews Genetics* 11:697–709.

- 702 Andrews S. 2010. FastQC: a quality control tool for high throughput sequence data. Available online  
703 at: <http://www.bioinformatics.babraham.ac.uk/projects/fastqc>
- 704 Arnold B, Corbett-Detig RB, Hartl D, Bomblies K. 2013. RADseq underestimates diversity and  
705 introduces genealogical biases due to nonrandom haplotype sampling. *Molecular Ecology* 22:3179–  
706 3190.
- 707 Atta-Mills J, Alder J, Sumaila UR. 2004. The decline of a regional fishing nation: The case of Ghana and  
708 West Africa. *Natural Resources Forum* 28:13-21. Oxford, UK: Blackwell Publishing Ltd.
- 709 Avise JC. 1990. Principles of genealogical concordance in species concepts and biological taxonomy.  
710 *Oxford Surveys in Evolutionary Biology* 7:45-67.
- 711 Bercovitch FB, Berry PSM, Dagg A, Deacon F, Doherty JB, Lee DE, Mineur F, Muller Z, Ogden R, Seymour  
712 R, et al. 2017. How many species of giraffe are there? *Current Biology* 27R136–R137.
- 713 Bouckaert R, Heled J, Kühnert D, Vaughan T, Wu CH, Xie D, Suchard MA, Rambaut A, Drummond AJ.  
714 2014. BEAST 2: A Software Platform for Bayesian Evolutionary Analysis. *PLoS Computational Biology*,  
715 10:1–6.
- 716 Bryant D, Bouckaert R, Felsenstein J, Rosenberg NA, Roychoudhury A. 2012. Inferring species trees  
717 directly from biallelic genetic markers: Bypassing gene trees in a full coalescent analysis. *Molecular*  
718 *Biology and Evolution* 29:1917–1932.
- 719 Cadenat J. 1960. The Mobulidae of the West Coast of Africa. *Notes d'Ichtyologie ouest-africaine*  
720 22A:1053-1084.
- 721 Carstens BC, Pelletier TA, Reid NM, Satler JD. 2013. How to fail at species delimitation. *Molecular*  
722 *Ecology* 22:4369–4383.
- 723 Catchen JM, Amores A, Hohenlohe P, Cresko W, Postlethwait JH, De Koning DJ. 2011. Stacks: Building  
724 and Genotyping Loci De Novo From Short-Read Sequences. *G3: Genes, genomes, genetics* 1:171-182.
- 725 Couturier LIE, Marshall AD, Jaine FRA, Kashiwagi T, Pierce SJ, Townsend KA, Weeks SJ, Bennett MB,  
726 Richardson AJ. 2012. Biology, ecology and conservation of the Mobulidae. *Journal of Fish Biology*,  
727 80:1075–1119.
- 728 Croll DA, Dewar H, Dulvy NK, Fernando D, Francis MP, Galván-Magaña F, Hall M, Heinrichs S, Marshall  
729 A, Mccauley D, et al. 2016. Vulnerabilities and fisheries impacts: the uncertain future of manta and  
730 devil rays. *Aquatic Conservation: Marine and Freshwater Ecosystems*, 26:562–575.
- 731 Danecek P, Auton A, Abecasis G, Albers CA, Banks E, DePristo MA, Handsaker RE, Lunter G, Marth GT,  
732 Sherry ST, et al. 2011. The variant call format and VCFtools. *Bioinformatics* 27:2156–2158.
- 733 Darriba D, Taboada GL, Doallo R, Posada D. 2015. jModelTest 2: more models , new heuristics and  
734 high-performance computing. *Nature Methods* 9:6–9.
- 735 Dirzo R, Young HS, Galetti M, Ceballos G, Isaac NJB, Collen B. 2014. Defaunation in the Anthropocene.  
736 *Science* 345:401–406.
- 737 Doumbouya F. 2009. Rapport sur l'actualisation des etudes sure les raies mantas en Guinee. *Centre*  
738 *National des Sciences Halieutiques de Boussoura. Ministère de la Pêche et de l'Aquaculture. Republique*  
739 *de Guinee. Halieutiques Boussoura. Ministère la Pêche l'Aquaculture. Repub. Guinee*
- 740 Dulvy NK, Pardo SA, Simpfendorfer CA, Carlson JK. 2014. Diagnosing the dangerous demography of  
741 manta rays using life history theory. *PeerJ* 2:e400.
- 742 Fennessy J, Bidon T, Reuss F, Kumar V, Elkan P, Nilsson MA, Vamberger M, Fritz U, Janke A. 2016.

- 743 Multi-locus Analyses Reveal Four Giraffe Species Instead of One. *Current Biology* 26:2543–2549.
- 744 Fennessy J, Winter S, Reuss F, Kumar V, Nilsson MA, Vamberger M, Fritz U, Janke A. 2017. Response  
745 to "How many species of giraffe are there?". *Current Biology* 27:R137–R138.
- 746 Flouri T, Jiao X, Rannala B, Yang Z. 2018. Species Tree Inference with BPP Using Genomic Sequences  
747 and the Multispecies Coalescent. *Molecular Biology and Evolution* 35:2585–2593.
- 748 Foote AD, Morin PA. 2016. Genome-wide SNP data suggest complex ancestry of sympatric North  
749 Pacific killer whale ecotypes. *Heredity* 117:316–325.
- 750 Frankham R, Ballou JD, Dudash MR, Eldridge MDB, Fenster CB, Lacy RC, Mendelson JR, Porton IJ, Ralls  
751 K, Ryder OA. 2012. Implications of different species concepts for conserving biodiversity. *Biological  
752 Conservation* 153:25–31.
- 753 Funk WC, McKay JK, Hohenlohe PA, Allendorf FW. 2012. Harnessing genomics for delineating  
754 conservation units. *Trends in Ecology and Evolution* 27:489–496.
- 755 Gautier M, Gharbi K, Cezard T, Foucaud J, Kerdelhué C, Pudlo P, Cornuet JM, Estoup A. 2013. The effect  
756 of RAD allele dropout on the estimation of genetic variation within and between populations.  
757 *Molecular Ecology* 22:3165–3178.
- 758 Grummer JA, Bryson RW, Reeder TW. 2014. Species delimitation using bayes factors: Simulations and  
759 application to the sceloporus scalaris species group (Squamata: Phrynosomatidae). *Systematic Biology*  
760 63:119–133.
- 761 Herrera S, Shank TM. 2016. RAD sequencing enables unprecedented phylogenetic resolution and  
762 objective species delimitation in recalcitrant divergent taxa. *Molecular Phylogenetics and Evolution*  
763 100:70–79.
- 764 Hinojosa-Alvarez S, Walter RP, Diaz-Jaimes P, Galván-Magaña F, Paig-Tran EM. 2016. A potential third  
765 Manta Ray species near the Yucatán Peninsula? Evidence for a recently diverged and novel genetic  
766 *Manta* group from the Gulf of Mexico. *PeerJ* 4:e2586.
- 767 Jombart T. 2008. ADEGENET: a R package for the multivariate analysis of genetic markers.  
768 *Bioinformatics* 24:1403–1405.
- 769 Kashiwagi T, Marshall AD, Bennett MB, Ovenden JR. 2012. The genetic signature of recent speciation  
770 in manta rays (*Manta alfredi* and *M. birostris*). *Molecular Phylogenetics and Evolution* 64:212–218.
- 771 Kashiwagi T, Marshall AD, Bennett MB, Ovenden JR. 2011. Habitat segregation and mosaic sympatry  
772 of the two species of manta ray in the Indian and Pacific Oceans: *Manta alfredi* and *M. birostris*. *Marine  
773 Biodiversity Records* 4.
- 774 Kass RE, Raftery AE. 1995. Bayes factors. *Journal of the American Statistical Association* 90:773–795.
- 775 Kubatko LS, Degnan JH. 2007. Inconsistency of phylogenetic estimates from concatenated data under  
776 coalescence. *Systematic Biology* 56:17–24.
- 777 Kumar S, Stecher G, Tamura K. 2016. MEGA7: Molecular Evolutionary Genetics Analysis Version 7.0  
778 for Bigger Datasets. *Molecular Biology and Evolution* 33:1870–1874.
- 779 Lawson JM, Fordham S, O'Malley MP, Davidson LNK, Walls RHL, Heupel MR, Stevens G, Fernando D,  
780 Budziak A, Simpfendorfer CA, et al. 2017. Sympathy for the devil: a conservation strategy for devil and  
781 manta rays. *PeerJ* 5:e3027.
- 782 Leaché AD, Banbury BL, Felsenstein J, De Oca ANM, Stamatakis A. 2015. Short tree, long tree, right  
783 tree, wrong tree: New acquisition bias corrections for inferring SNP phylogenies. *Systematic Biology*

- 784 64:1032–1047.
- 785 Leache AD, Fujita MK, Minin VN, Bouckaert RR. 2014. Species delimitation using genome-wide SNP  
786 Data. *Systematic Biology* 63:534–542.
- 787 Lischer HEL, Excoffier L, Heckel G. 2014. Ignoring heterozygous sites biases phylogenomic estimates of  
788 divergence times: Implications for the evolutionary history of *Microtus voles*. *Molecular Biology and*  
789 *Evolution* 31:817-831.
- 790 Maddison W, Knowles L. 2006. Inferring phylogeny despite incomplete lineage sorting. *Systematic*  
791 *Biology* 55:21-30.
- 792 Maddison WP. 1997. Gene trees in species trees. *Systematic Biology* 46:523-526.
- 793 Marshall AD, Compagno LJV, Bennett MB. 2009. Redescription of the genus *Manta* with resurrection  
794 of *Manta alfredi* (Krefft, 1868) (Chondrichthyes; Myliobatoidei; Mobulidae). *Zootaxa* 2301:1–28.
- 795 Mastretta-Yanes A, Arrigo N, Alvarez N, Jorgensen TH, Piñero D, Emerson BC. 2015. Restriction site-  
796 associated DNA sequencing, genotyping error estimation and de novo assembly optimization for  
797 population genetic inference. *Molecular Ecology Resources* 15:28–41.
- 798 McGill BJ, Dornelas M, Gotelli NJ, Magurran AE. 2015. Fifteen forms of biodiversity trend in the  
799 anthropocene. *Trends in Ecology and Evolution* 30:104–113.
- 800 Notarbartolo di Sciarra G, Fernando D, Adnet S, Cappetta H, Jabado RW. 2017. Devil rays  
801 (Chondrichthyes: *Mobula*) of the Arabian Seas, with a redescription of *Mobula kuhlii* (Valenciennes in  
802 Müller and Henle, 1841). *Aquatic Conservation: Marine and Freshwater Ecosystems* 27:197-218.
- 803 Notarbartolo Di Sciarra G. 1987. A revisionary study of the genus *Mobula* Rafinesque, 1810  
804 (Chondrichthyes: Mobulidae) with the description of a new species. *Zoological Journal of the Linnean*  
805 *Society* 91:1–91.
- 806 O'Malley MP, Townsend KA, Hilton P, Heinrichs S, Stewart JD. 2017. Characterization of the trade in  
807 manta and devil ray gill plates in China and South-east Asia through trader surveys. *Aquatic*  
808 *Conservation: Marine and Freshwater Ecosystems* 27:394-413.
- 809 O'Malley MP, Lee-Brooks K, Medd HB. 2013. The Global Economic Impact of Manta Ray Watching  
810 Tourism. *PLoS ONE* 8:e65051.
- 811 Paig-Tran EWM, Kleinteich T, Summers AP. 2013. The filter pads and filtration mechanisms of the devil  
812 rays: Variation at macro and microscopic scales. *Journal of Morphology* 274:1026–1043.
- 813 Palaikostas C, Bekaert M, Khan MGQ, Taggart JB, Gharbi K, McAndrew BJ, Penman DJ. 2015. A novel  
814 sex-determining QTL in Nile tilapia (*Oreochromis niloticus*). *BMC Genomics* 16:1–10.
- 815 Pante E, Abdelkrim J, Viricel A, Gey D, France SC, Boisselier MC, Samadi S. 2014. Use of RAD sequencing  
816 for delimiting species. *Heredity*. 114:450–459.
- 817 Paris JR, Stevens JR, Catchen JM. 2017. Lost in parameter space: A road map for stacks. *Methods in*  
818 *Ecology and Evolution* 8:1360-1373.
- 819 Patton JL, Smith MF. 1994. Paraphyly, polyphyly, and the nature of species boundaries in pocket  
820 gophers (genus *thomomys*). *Systematic Biology* 43:11-26.
- 821 Peterson BK, Weber JN, Kay EH, Fisher HS, Hoekstra HE. 2012. Double digest RADseq: An inexpensive  
822 method for de novo SNP discovery and genotyping in model and non-model species. *PLoS ONE*  
823 7:e37135.
- 824 Petit RJ, Excoffier L. 2009. Gene flow and species delimitation. *Trends in Ecology and Evolution* 24:386–

- 825 393.
- 826 Pickrell JK, Pritchard JK. 2012. Inference of Population Splits and Mixtures from Genome-Wide Allele  
827 Frequency Data. *PLoS Genetics*, 8:e1002967.
- 828 Poortvliet M, Olsen JL, Croll DA, Bernardi G, Newton K, Kollias S, Sullivan JO, Fernando D, Stevens G,  
829 Galván F, et al. 2015. A dated molecular phylogeny of manta and devil rays (Mobulidae) based on  
830 mitogenome and nuclear sequences. *Molecular Phylogenetics and Evolution* 83:72–85.
- 831 De Queiroz K. 2007. Species concepts and species delimitation. *Systematic Biology* 56:879–886.
- 832 Rambaut A, Drummond AJ, Xie D, Baele G, Suchard MA. 2018. Posterior Summarization in Bayesian  
833 Phylogenetics Using Tracer 1.7. *Systematic Biology* 67:901–904.
- 834 Rannala B. 2015. The art and science of species delimitation. *Current Zoology* 61:846–853.
- 835 Reich D, Thangaraj K, Patterson N, Price AL, Singh L. 2009. Reconstructing Indian population history.  
836 *Nature* 461:489.
- 837 Roca AL, Georgiadis N, Pecon-Slattery J, O’Brien SJ. 2001 Genetic evidence for two species of elephant  
838 in Africa. *Science* 293:1473–1477.
- 839 Shafer ABA, Wolf JBW, Alves PC, Bergström L, Bruford MW, Brännström I, Colling G, Dalén L, De  
840 Meester L, Ekblom R, et al. 2015. Genomics and the challenging translation into conservation practice.  
841 *Trends in Ecology and Evolution* 30:78–87.
- 842 Shen XX, Hittinger CT, Rokas A. 2017. Contentious relationships in phylogenomic studies can be driven  
843 by a handful of genes. *Nature Ecology and Evolution* 1:1–10.
- 844 Stamatakis A. 2014. RAxML version 8 : a tool for phylogenetic analysis and post-analysis of large  
845 phylogenies. *Bioinformatics* 30:1312–1313.
- 846 Stevens G, Fernando D, Dando M, Notarbartolo Di Sciara GN. 2018. Guide to the Manta and Devil Rays  
847 of the World. Princeton University Press.
- 848 Stewart JD, Jaine FRA, Armstrong AJ, Armstrong AO, Bennett MB, Burgess KB, Couturier LIE, Croll DA,  
849 Cronin MR, Deakos MH, et al. 2018a. Research Priorities to Support Effective Manta and Devil Ray  
850 Conservation. *Front Mar Sci* 5:314.
- 851 Stewart JD, Nuttall M, Hickerson EL, Johnston MA. 2018b. Important juvenile manta ray habitat at  
852 Flower Garden Banks National Marine Sanctuary in the northwestern Gulf of Mexico. *Marine Biology*  
853 165:111.
- 854 Sukumaran J, Knowles LL. 2017. Multispecies coalescent delimits structure, not species. *Proceedings  
855 of the National Academy of Sciences* 114:1607–1612.
- 856 Vincent ACJ, Sadovy de Mitcheson YJ, Fowler SL, Lieberman S. 2014. The role of CITES in the  
857 conservation of marine fishes subject to international trade. *Fish and Fisheries* 15:563–592.
- 858 Walter RP, Kessel ST, Alhasan N, Fisk AT, Heath DD, Chekchak T, Klaus R, Younis M, Hill G, Jones B, et  
859 al. 2014. First record of living Manta alfredi × Manta birostris hybrid. *Marine Biodiversity* 44:1–2.
- 860 Ward RD, Zemlak TS, Innes BH, Last PR, Hebert PDN. 2005. DNA barcoding Australia’s fish species.  
861 *Philosophical transactions of the Royal Society of London. Series B, Biological sciences* 360:1847–1857.
- 862 White WT, Corrigan S, Yang L, Henderson AC, Bazinet AL, Swofford DL, Naylor GJP. 2017. Phylogeny of  
863 the manta and devilrays (Chondrichthyes: Mobulidae), with an updated taxonomic arrangement for  
864 the family. *Zoological Journal of the Linnean Society*, 182:50-75.



- 865 Yang Z. 2015. The BPP program for species tree estimation and species delimitation. *Current Zoology*  
866 61:854–865.
- 867 Ye J, Coulouris G, Zaretskaya I, Cutcutache I, Rozen S, Madden TL. 2012. Primer-BLAST: a tool to design  
868 target-specific primers for polymerase chain reaction. *BMC bioinformatics* 13:134.
- 869 Zhang J, Kapli P, Pavlidis P, Stamatakis A. 2013. A general species delimitation method with  
870 applications to phylogenetic placements. *Bioinformatics* 29:2869–2876.
